# Supplementary material
Source: PubMed Central journal article supplement (PMC218756)
Supplement: pnas_1635114100_3.pdf [file pnas_1635114100_3.pdf]

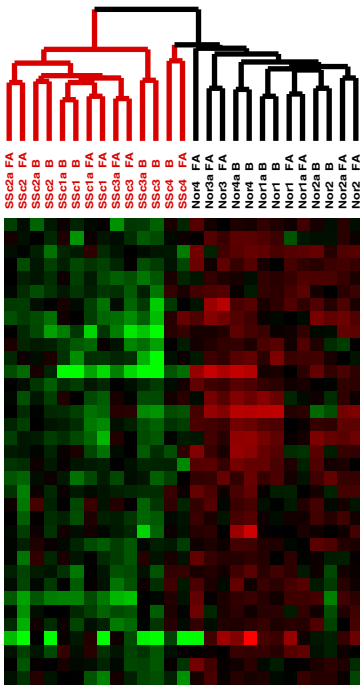

| GENE NAME                                              | BIOLOGICAL PROCESS                       | CELLULAR COMPONENT                |
|--------------------------------------------------------|------------------------------------------|-----------------------------------|
| KIAA0582 protein                                       | ----                                     | *plasma membrane                  |
| AGTR1, angiotensin receptor 1                          | signal transduction                      | plasma membrane                   |
| EGIL3, EGF-like repeats and discoidin I-like domains 3 | *signal transduction / angiogenesis      | plasma membrane                   |
| KIAA0703 gene                                          | *transporter                             | *plasma membrane                  |
| Homo sapiens clone 24507 mRNA sequence                 | ----                                     | ----                              |
| PRKCBP1, protein kinase C binding protein 1            | ----                                     | *plasma membrane                  |
| GP1BA, glycoprotein Ib platelet, alpha polypeptide     | cell adhesion                            | plasma membrane                   |
| TGF-beta receptor III (betaglycan, 300kD)              | signal transduction                      | plasma membrane                   |
| CHRNB1, nicotinic acetylcholine receptor beta (muscle) | signal transduction / muscle contraction | plasma membrane                   |
| ABCC8, ATP-binding cassette C8                         | potassium transport                      | plasma membrane                   |
| ST3GALVI, alpha2,3-sialyltransferase                   | glycolipid metabolism                    | plasma membrane                   |
| WIF1, Wnt inhibitory factor-1                          | signal transduction                      | *secreted                         |
| DF, (Adipsin) D component of complement                | proteolysis                              | *secreted                         |
| CILP, cartilage intermediate layer protein             | protein phosphatase                      | secreted                          |
| IGFBP6, insulin-like growth factor bp 6                | signal transduction                      | secreted                          |
| TNA, tetranectin (plasminogen-binding protein)         | skeletal development                     | secreted                          |
| TM4SF3, transmembrane 4 superfamily member 3           | protein glycosylation                    | plasma membrane                   |
| GOLPH4, type II Golgi membrane protein                 | ----                                     | plasma membrane / golgi apparatus |
| eIF2S3, translation initiation factor 2, subunit 3     | translation                              | ribosome                          |
| NRG1, neuregulin 1                                     | cell growth                              | *plasma membrane / secreted       |
| RASGRP1, RAS guanyl releasing protein 1                | signal transduction                      | *plasma membrane                  |
| FUT1, fucosyltransferase 1                             | glycosylation                            | plasma membrane / golgi apparatus |
| hypothetical protein MGC4954                           | ----                                     | ----                              |
| ISL1 transcription factor, LIM/homeodomain             | *motor neuron differentiation            | *nucleus                          |
| KLFS, Kruppel-like factor 5                            | transcription                            | *nucleus                          |
| CDH4, cadherin 4, R-cadherin                           | cell adhesion                            | plasma membrane                   |
| IGFBP5, insulin-like growth factor bp 5                | signal transduction                      | secreted                          |
| PAEP, progesterone-associated endometrial protein      | developmental process                    | *secreted                         |
| DPP6, dipeptidylpeptidase VI                           | ----                                     | *plasma membrane                  |
| ADAM20, a disintegrin and metalloproteinase 20         | ----                                     | *plasma membrane                  |
| CBORF1, chromosome 8 open reading frame 1              | ----                                     | ----                              |
| early endosome antigen 1, 162kD                        | non-selective vesicle transport          | *plasma membrane / early endosome |
| GSTM4, glutathione S-transferase M4                    | ----                                     | cytoplasm                         |
| CP, ceruloplasmin ferroxidase                          | iron / cooper homeostasis                | secreted                          |
| PLAGL1, pleiomorphic adenoma gene-like 1               | induction of apoptosis                   | *nuclear                          |
