# Supplementary material
Source: PubMed Central journal article supplement (PMC218756)
Supplement: pnas_1635114100_5.pdf [file pnas_1635114100_5.pdf]

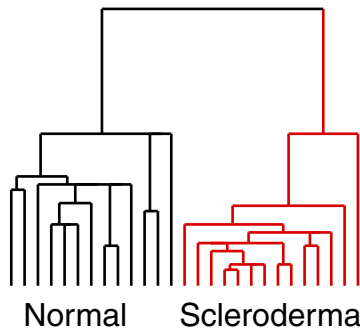

|       | Normal | Scleroderma | p-value | Name   Accession                                                                                       |
|-------|--------|-------------|---------|--------------------------------------------------------------------------------------------------------|
| 0.043 |        |             |         | CALR calreticulin NM_004343                                                                            |
| 0.043 |        |             |         | Cluster Incl. M26576:Human alpha-1 collagen type IV gene                                               |
| 0.043 |        |             |         | COL15A1 collagen, type XV, alpha 1 NM_001855                                                           |
| 0.043 |        |             |         | FKBP1A FK506-binding protein 1A 12kD BC008791                                                          |
| 0.043 |        |             |         | IFI27 interferon, alpha-inducible protein 27 NM_005532                                                 |
| 0.043 |        |             |         | IFITM1 interferon induced transmembrane protein 1 9-27 NM_003641                                       |
| 0.043 |        |             |         | IFITM1 interferon induced transmembrane protein 1 9-27 NM_003641                                       |
| 0.043 |        |             |         | IGFBP4 insulin-like growth factor-binding protein 4 NM_001552                                          |
| 0.043 |        |             |         | KIAA0731 KIAA0731 protein AB018274                                                                     |
| 0.043 |        |             |         | LGALS3BP lectin, galactoside-binding, soluble, 3 binding protein NM_005567                             |
| 0.043 |        |             |         | PFN1 profilin 1 NM_005022                                                                              |
| 0.053 |        |             |         | ARRB2 arrestin, beta 2 NM_004313                                                                       |
| 0.053 |        |             |         | MAPRE1 microtubule-associated protein, RP/EB family, member 1 NM_012325                                |
| 0.053 |        |             |         | TNRC3 trinucleotide repeat containing 3 NM_005878                                                      |
| 0.067 |        |             |         | ACTN1 actinin, alpha 1 NM_001102                                                                       |
| 0.067 |        |             |         | Cluster Incl. M26225:Human JE gene encoding a monocyte secretory protein                               |
| 0.067 |        |             |         | D2S448 Melanoma associated gene AF200348                                                               |
| 0.067 |        |             |         | NID2 nidogen 2 NM_007361                                                                               |
| 0.067 |        |             |         | TAPBP TAP binding protein tapasin AF029750                                                             |
| 0.083 |        |             |         | CTGF connective tissue growth factor NM_001901                                                         |
| 0.083 |        |             |         | IGFBP4 insulin-like growth factor-binding protein 4 NM_001552                                          |
| 0.083 |        |             |         | NME1 non-metastatic cells 1, protein NM23A expressed in NM_000269                                      |
| 0.083 |        |             |         | PGAM1 phosphoglycerate mutase 1 brain NM_002629                                                        |
| 0.083 |        |             |         | SLC21A9 solute carrier family 21 organic anion transporter, member 9 NM_007256                         |
| 0.103 |        |             |         | AD000092                                                                                               |
| 0.103 |        |             |         | NDN necdin mouse homolog NM_002487                                                                     |
| 0.103 |        |             |         | NME1 non-metastatic cells 1, protein NM23A expressed in NM_000269                                      |
| 0.103 |        |             |         | PSMA4 proteasome prosome, macropain subunit, alpha type, 4 NM_002789                                   |
| 0.103 |        |             |         | PSMA4 proteasome prosome, macropain subunit, alpha type, 4 NM_002789                                   |
| 0.103 |        |             |         | S100A11 S100 calcium-binding protein A11 calgizzarin NM_005620                                         |
| 0.103 |        |             |         | SCYA2 small inducible cytokine A2 monocyte chemotactic protein 1, homologous to mouse Sig-je NM_002982 |
| 0.103 |        |             |         | SHC1 SHC Src homology 2 domain-containing transforming protein 1 NM_003029                             |
| 0.103 |        |             |         | UBE2A ubiquitin-conjugating enzyme E2A RAD6 homolog NM_003336                                          |
| 0.127 |        |             |         | ARF4 ADP-ribosylation factor 4 NM_001660                                                               |
| 0.127 |        |             |         | ARHGAP1 Rho GTPase activating protein 1 U02570                                                         |
| 0.127 |        |             |         | CD151 CD151 antigen NM_004357                                                                          |
| 0.127 |        |             |         | CDK2AP1 CDK2-associated protein 1 NM_004642                                                            |
| 0.127 |        |             |         | Fk506-Binding Protein, Alt. Splice 2                                                                   |
| 0.127 |        |             |         | IFI30 interferon, gamma-inducible protein 30 NM_006332                                                 |
| 0.127 |        |             |         | IFI30 interferon, gamma-inducible protein 30 NM_006332                                                 |
| 0.127 |        |             |         | KIAA0750 gene product NM_014632                                                                        |
| 0.127 |        |             |         | PBX2 pre-B-cell leukemia transcription factor 2 NM_002586                                              |
| 0.127 |        |             |         | PSMD9 proteasome prosome, macropain 26S subunit, non-ATPase, 9 BC002383                                |
| 0.127 |        |             |         | RAB5C RAB5C, member RAS oncogene family NM_004583                                                      |
| 0.043 |        |             |         | BMP10 bone morphogenetic protein 10 NM_014482                                                          |
| 0.043 |        |             |         | KIAA0703 KIAA0703 gene product NM_014861                                                               |
| 0.043 |        |             |         | KYNU kynureninase L-kynurenine hydrolase NM_003937                                                     |
| 0.043 |        |             |         | LTBP4 latent transforming growth factor beta binding protein 4 NM_003573                               |
| 0.043 |        |             |         | NOVA1 neuro-oncological ventral antigen 1 NM_002515                                                    |
| 0.043 |        |             |         | WIF-1 Wnt inhibitory factor-1 NM_007191                                                                |
| 0.053 |        |             |         | ISL1 ISL1 transcription factor, LIM/homeodomain, islet-1 NM_002202                                     |
| 0.053 |        |             |         | TNA tetranectin plasminogen-binding protein NM_003278                                                  |
| 0.067 |        |             |         | EIF3S4 eukaryotic translation initiation factor 3, subunit 4 delta, 44kD NM_003755                     |
| 0.067 |        |             |         | M64936 Homo sapiens retinoic acid-inducible endogenous retroviral DNA                                  |
| 0.067 |        |             |         | M64936 Homo sapiens retinoic acid-inducible endogenous retroviral DNA                                  |
| 0.067 |        |             |         | NRG1 neuregulin 1 NM_013957                                                                            |
| 0.067 |        |             |         | TGFB2 transforming growth factor, beta 2 NM_003238                                                     |
| 0.083 |        |             |         | GRO1 GRO1 oncogene melanoma growth stimulating activity, alpha NM_001511                               |
| 0.083 |        |             |         | ING1 inhibitor of growth family, member 1 NM_005537                                                    |
| 0.083 |        |             |         | RPS6KB2 ribosomal protein S6 kinase, 70kD, polypeptide 2 NM_003952                                     |
| 0.103 |        |             |         | GP1B glycoprotein Ib platelet, alpha polypeptide NM_000173                                             |
| 0.103 |        |             |         | Guanine Nucleotide Exchange Factor 1                                                                   |
| 0.103 |        |             |         | Guanine Nucleotide Exchange Factor 1                                                                   |
| 0.103 |        |             |         | PAFAH1B1 platelet-activating factor acetylhydrolase, isoform Ib, alpha subunit 45kD NM_000430          |
| 0.103 |        |             |         | SCYA2 small inducible cytokine A2 monocyte chemotactic protein 1, homologous to mouse Sig-je NM_002982 |
| 0.127 |        |             |         | Human thrombospondin-1 gene, partial cds U12471                                                        |
| 0.127 |        |             |         | ABC8 ATP-binding cassette, sub-family C CFTR/MRP, member 8 NM_000352                                   |
| 0.127 |        |             |         | C4BPA complement component 4-binding protein, alpha NM_000715                                          |
| 0.127 |        |             |         | FLJ22531 hypothetical protein FLJ22531 NM_024650                                                       |
| 0.127 |        |             |         | GNA11 guanine nucleotide binding protein G protein, alpha 11 Gq class NM_002067                        |
| 0.127 |        |             |         | GNA11 guanine nucleotide binding protein G protein, alpha 11 Gq class NM_002067                        |
| 0.127 |        |             |         | NTRK2 neurotrophic tyrosine kinase, receptor, type 2 NM_006180                                         |
| 0.127 |        |             |         | NTRK2 neurotrophic tyrosine kinase, receptor, type 2 NM_006180                                         |
