# Supplementary material
Source: PubMed Central journal article supplement (PMC218756)

**A**

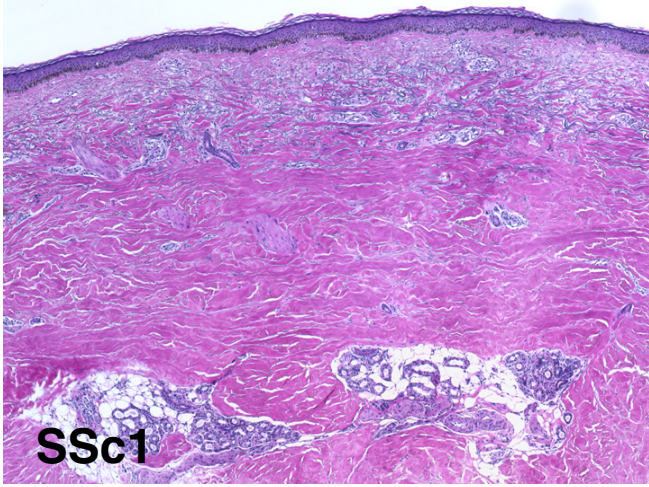

**C**

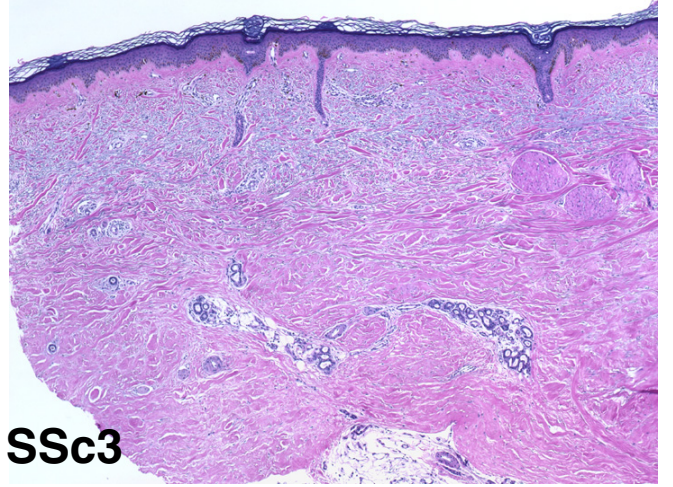

**B**

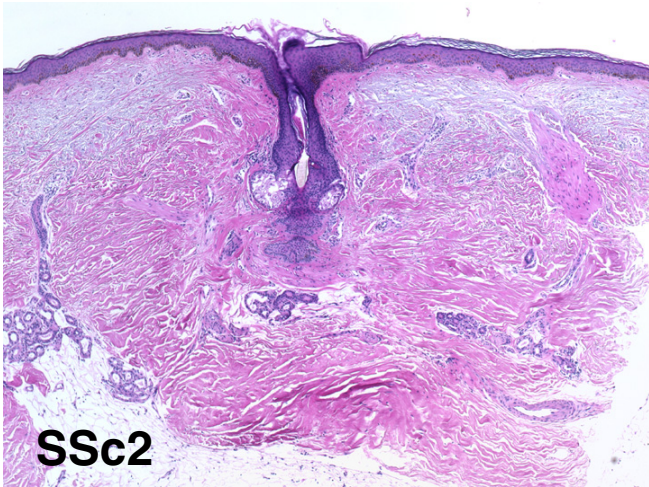

**D**

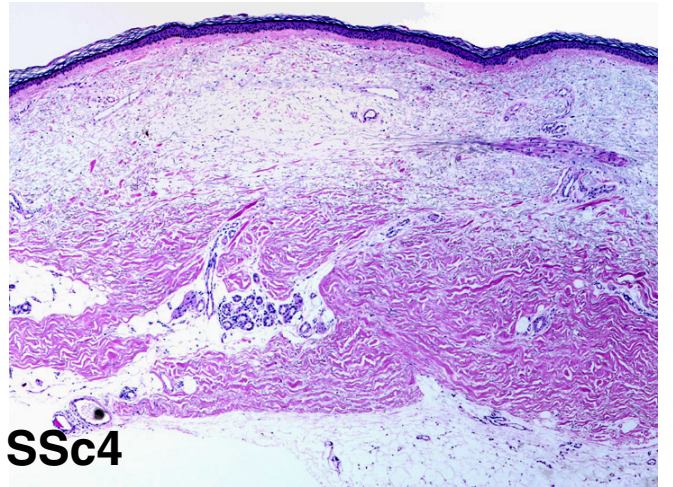

**E**

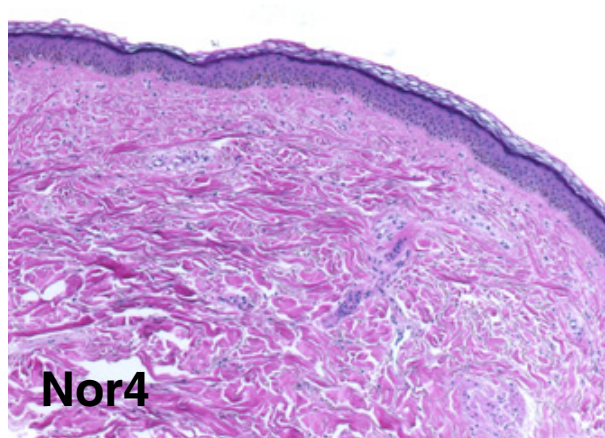

Supplement: pnas_1635114100_7.pdf [file pnas_1635114100_7.pdf]
